# Supplementary material for: A multi-functional two-dimensional Zn(ii)-organic framework for selective carbon dioxide adsorption, sensing of nitrobenzene and Cr2O72−
Source: Royal Society of Chemistry journal article supplement (doi:10.1039/d1ce01095f), 2021-01-01
Supplement: d1ce01095f1.pdf [file d1ce01095f1.pdf]

## Electronic Supporting Information

### A Multi-Functional Two-Dimensional Zn(II)-Organic Framework for Selective Carbon Dioxide Adsorption, Sensing of Nitrobenzene and $\text{Cr}_2\text{O}_7^{2-}$

Qi Wu, Xiao-Li Yang, Ze-Yu Ding, Xiao-Yun Meng, Wen-Yan Zhang,\* Yang-Tian Yan,\* Guo-Ping Yang, and Yao-Yu Wang

<sup>a</sup> Key Laboratory of Synthetic and Natural Functional Molecule of Ministry of Education, Shaanxi Key Laboratory of Physico-Inorganic Chemistry, College of Chemistry & Materials Science, and, School of Chemical Engineering, Northwest University, Xi'an 710127, P. R. China.

<sup>b</sup> School of Materials Science & Engineering, Xi'an Polytechnic University, Xi'an 710048, P. R. China.

**Table S1.** Bond lengths [Å] and angles [°]

| 1                   |            |
|---------------------|------------|
| Zn(1)-O(1)          | 1.948(4)   |
| Zn(1)-O(3)#1        | 1.959(4)   |
| Zn(1)-O(5)#2        | 1.955(4)   |
| Zn(1)-N(1)#3        | 2.037(5)   |
| O(1)-Zn(1)-O(3)#1   | 117.41(18) |
| O(1)-Zn(1)-O(5)#2   | 116.12(17) |
| 116.12(17)          | 107.11(18) |
| O(3)#1-Zn(1)-N(1)#3 | 99.75(19)  |
| O(5)#2-Zn(1)-O(3)#1 | 104.89(18) |
| O(5)#2-Zn(1)-N(1)#3 | 110.30(18) |

Symmetry transformations used to generate equivalent atoms: #1:  $x+1/2, -y+3/2, z+1/2$ ; #2:  $x, y+1, z$ ; #3:  $-x+3/2, y+1/2, -z+3/2$ ; #4:  $x-1/2, -y+3/2, z-1/2$ ; #5:  $x, y-1, z$ ; #6:  $-x+3/2, y-1/2, -z+3/2$ .

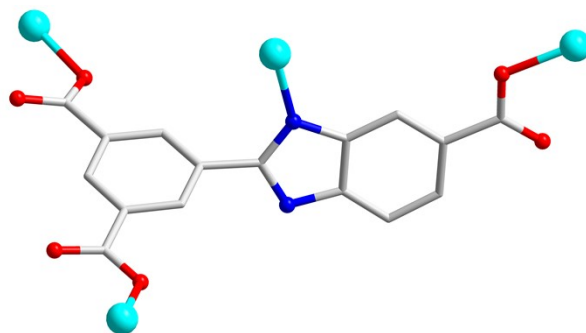

**Fig. S1.** The coordination modes of  $L^{3-}$  ligands in **1**.

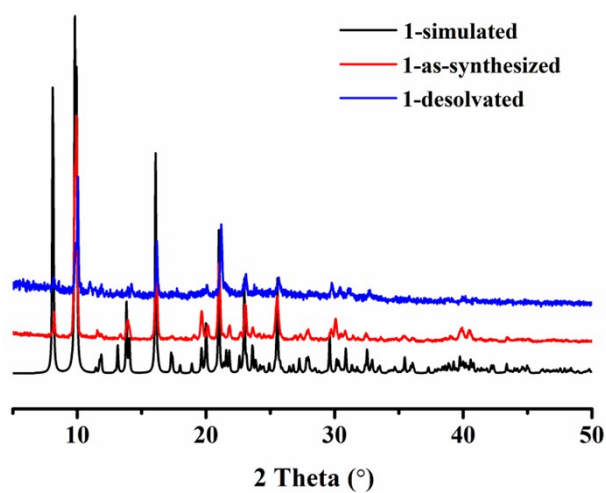

**Fig. S2.** PXRD patterns of **1**

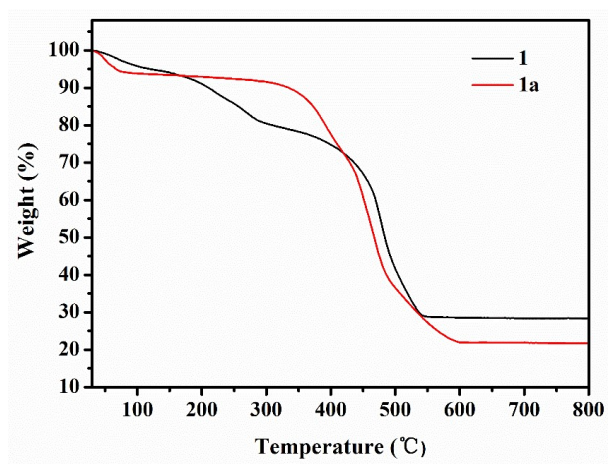

**Fig. S3.** TGA curves of the as-synthesized **1** and desolvated sample **1a**.

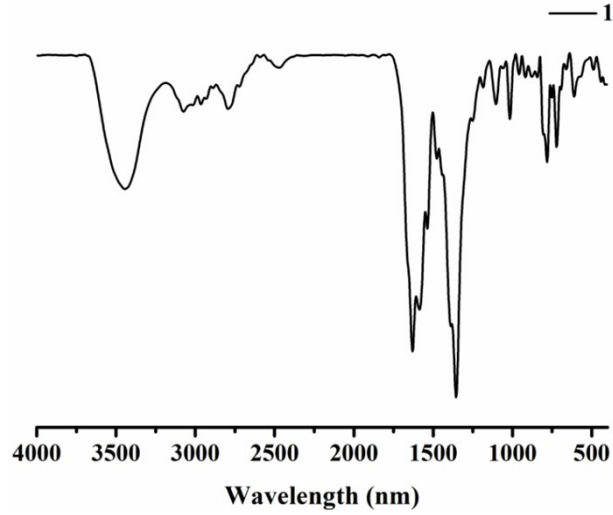

**Fig. S4.** The FT-IR spectra of the as synthesized **1**.

### IAST adsorption selectivity calculation

The experimental isotherm data for pure CO<sub>2</sub> and CH<sub>4</sub> (measured at 273 and 298 K) were fitted using a Langmuir-Freundlich (L-F) model

$$q = \frac{a * b * p^c}{1 + b * p^c}$$

Where  $q$  and  $p$  are adsorbed amounts and pressures of component  $i$ , respectively. The adsorption selectivities for binary mixtures of CO<sub>2</sub>/CH<sub>4</sub> at 273 and 298 K, defined by

$$S_{\text{ads}} = (q_1/q_2)/(p_1/p_2)$$

Where  $q_i$  is the amount of  $i$  adsorbed and  $p_i$  is the partial pressure of  $i$  in the mixture.

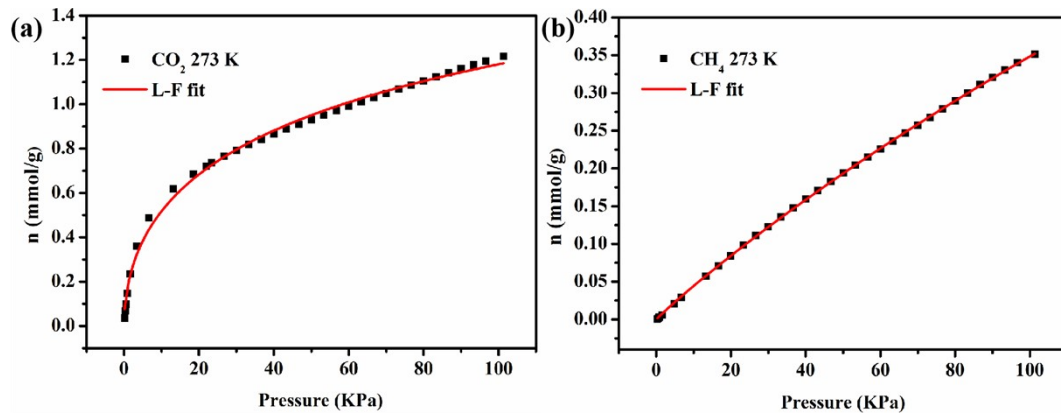

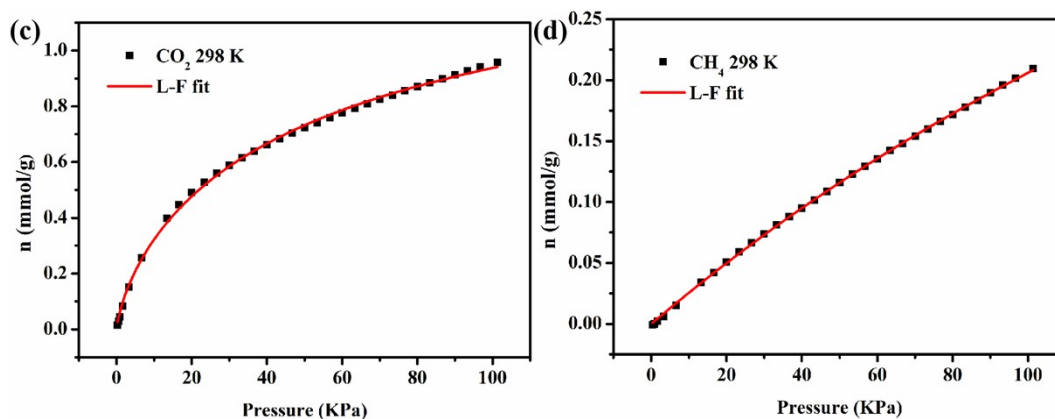

**Fig. S5.** (a) CO<sub>2</sub> adsorption isotherms of **1a** at 273K with fitting by L-F model:  $a = 2.68891$ ,  $b = 0.07262$ ,  $c = 0.51606$ ,  $\text{Chi}^2 = 5.51534\text{E-}4$ ,  $R^2 = 0.99552$ ; (b) CH<sub>4</sub> adsorption isotherms of **1a** at 273 K with fitting by L-F model:  $a = 2.29251$ ,  $b = 0.00215$ ,  $c = 0.96041$ ,  $\text{Chi}^2 = 1.29167\text{E-}6$ ,  $R^2 = 0.99990$ ; (c) CO<sub>2</sub> adsorption isotherms of **1a** at 298K with fitting by L-F model:  $a = 1.58553$ ,  $b = 0.04502$ ,  $c = 0.75334$ ,  $\text{Chi}^2 = 1.04563\text{E-}$ ,  $R^2 = 0.99876$ ; (d) CH<sub>4</sub> adsorption isotherms of **1a** at 298K with fitting by L-F model:  $a = 0.8808$ ,  $b = 0.0029$ ,  $c = 1.01126$ ,  $\text{Chi}^2 = 1.36911\text{E-}6$ ,  $R^2 = 0.9997$ .

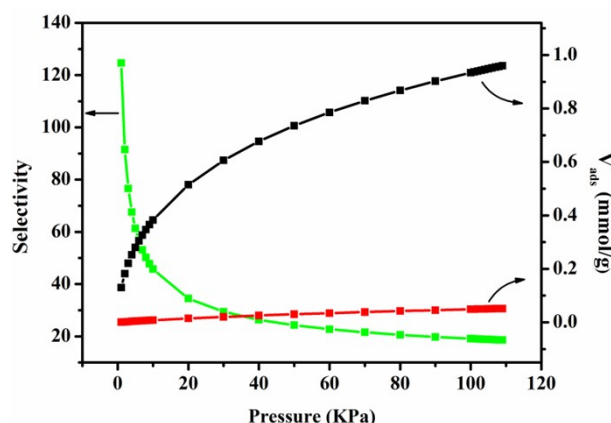

**Fig. S6.** IAST adsorption selectivities of **1a** for the equimolar mixture of CO<sub>2</sub> and CH<sub>4</sub> (50:50) at 273 K.

### Calculation of sorption heat for CO<sub>2</sub> uptake using Virial-II mode

$$\ln P = \ln N + \frac{1}{T} \sum_{i=0}^m a_i N^i + \sum_{i=0}^n b_i N^i \quad Q_{st} = -R \sum_{i=0}^m a_i N^i$$

The above equation was applied to fit the combined CO<sub>2</sub> isotherm data for desolvated **1a** at 273 and 298 K, where  $P$  is the pressure,  $N$  is the adsorbed amount,  $T$  is the temperature,  $a_i$  and  $b_i$  are virial coefficients, and  $m$  and  $n$  are the number of coefficients

used to describe the isotherms.  $Q_{st}$  is the coverage-dependent enthalpy of adsorption and  $R$  is the universal gas constant.

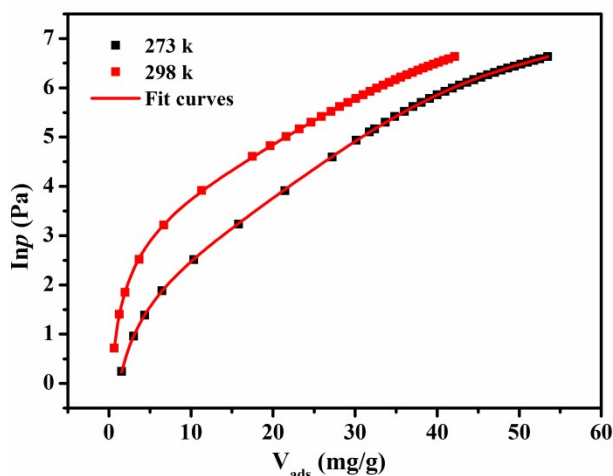

**Fig. S7.** Virial analysis of the CO<sub>2</sub> adsorption data at 273 and 298 K for **1a**.

Fitting results:  $a_0 = -4527.98711$ ,  $a_1 = 41.0419$ ,  $a_2 = 0.01962$ ,  $a_3 = 0.03776$ ,  $a_4 = -9.12027E-4$ ,  $a_5 = 6.56488E-6$ ;  $b_0 = 16.3151$ ,  $b_1 = -0.10336$ ,  $b_2 = -0.00145$ ;  $\chi^2 = 9.82062E-5$ ,  $R^2 = 0.99996$ .

**Table S2.** Comparison of  $K_{sv}$  values and/or detecting limits between **1** and the selected MOFs for nitrobenzene.

| Entry | MOFs                                                                                                      | $K_{sv}/M^{-1}$     | Detecting limits/M    | Media            | Ref       |
|-------|-----------------------------------------------------------------------------------------------------------|---------------------|-----------------------|------------------|-----------|
| 1     | [Zn(HNTB)(phen)] <sub>n</sub>                                                                             | 60.75               | $7.53 \times 10^{-4}$ | DMF              | 1         |
| 2     | [Tb(L <sub>1</sub> )(H <sub>2</sub> O) <sub>2</sub> ]·guest                                               | 589.6               |                       | N-hexane         | 2         |
| 3     | [Tb(L <sub>2</sub> )(H <sub>2</sub> O) <sub>2</sub> ]·guest                                               | 445.5               |                       |                  |           |
| 4     | [Zn <sub>3</sub> (TPPA) <sub>2</sub> (DHTP) <sub>3</sub> ]<br>·2DMF                                       | $1.86 \times 10^2$  |                       | Ethanol          | 3         |
| 5     | {[Tb <sub>2</sub> (L) <sub>3</sub> (H <sub>2</sub> O) <sub>4</sub> ]·10<br>H <sub>2</sub> O} <sub>n</sub> | $1.8 \times 10^3$   |                       | DMF              | 4         |
| 6     | <b>1</b>                                                                                                  | $1.88 \times 10^3$  | $6.38 \times 10^{-4}$ | DMF              | This work |
| 7     | [Zn(H <sub>2</sub> L <sup>2-</sup> )(H <sub>2</sub> O)] <sub>n</sub>                                      | $3.26 \times 10^3$  |                       | DMF              | 5         |
| 8     | [Zn(tba) <sub>2</sub> ]·DMA                                                                               | $8.58 \times 10^3$  | $8.33 \times 10^{-5}$ | DMF              | 6         |
| 9     | [Eu <sub>2</sub> (MPDA) <sub>3</sub> (H <sub>2</sub> O) <sub>2</sub> ]<br>·2H <sub>2</sub> O              | $1.033 \times 10^4$ | $5.69 \times 10^{-6}$ | Ethanol          | 7         |
| 10    | {[Tb(DMTDC) <sub>1.5</sub> (H <sub>2</sub><br>O) <sub>2</sub> ]·DEF} <sub>n</sub>                         | $1.69 \times 10^4$  |                       | DMF              | 8         |
| 11    | [Pb <sub>2</sub> (2-NCP) <sub>2</sub> (L <sub>1</sub> )] <sub>n</sub>                                     | $1.62 \times 10^7$  | $4.0 \times 10^{-10}$ | H <sub>2</sub> O | 9         |

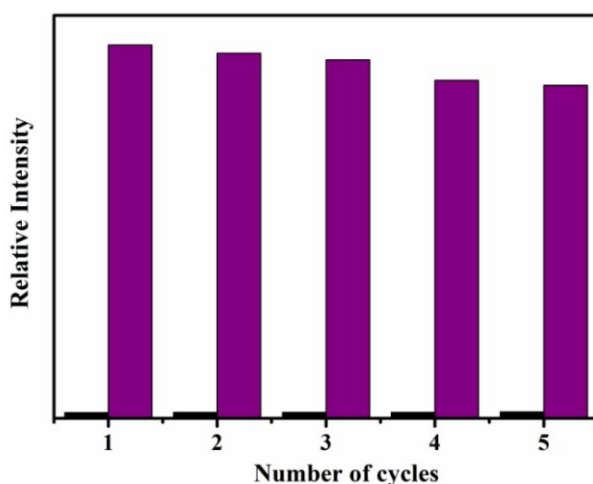

**Fig. S8.** Recoverable fluorescence intensity of **1** in recyclable experiments for nitrobenzene.

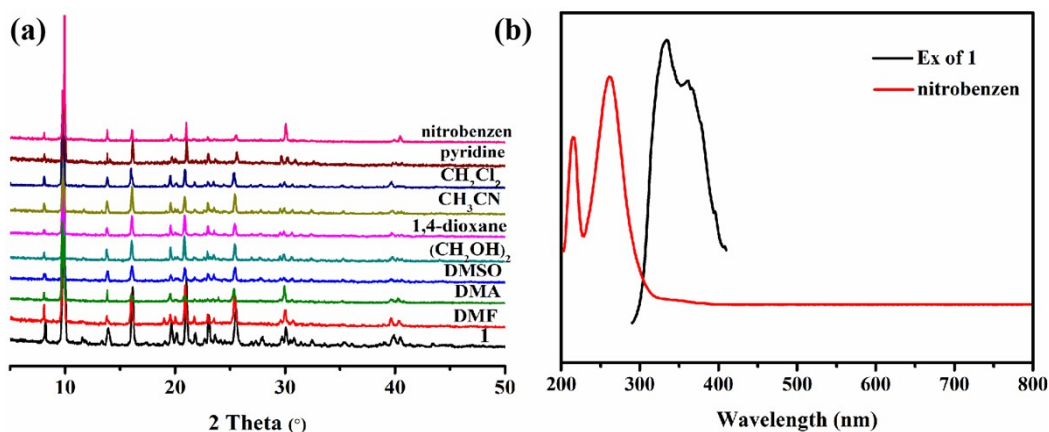

**Fig. S9** (a) PXRD patterns of **1** treated by different small organic solvents. (b) UV-vis absorption spectra of nitrobenzene, and the excitation spectrum of **1**.

**Table S3.** Comparison of  $K_{sv}$  values and/or detecting limits between **1** and the selected MOFs for  $Cr_2O_7^{2-}$  ion.

| Entry | MOFs                                                   | $K_{sv}/M^{-1}$    | Detecting limits/M    | Media            | Ref.      |
|-------|--------------------------------------------------------|--------------------|-----------------------|------------------|-----------|
| 1     | $[Zn(OBA)_2(L_1) \cdot 2DMA]_n$                        | $1.89 \times 10^3$ | $2.37 \times 10^{-9}$ | H <sub>2</sub> O | 10        |
| 2     | $\{[Eu(dpc)(2H_2O)] \cdot (Hbibp)_{0.5}\}_n(VI)$       | $3.97 \times 10^3$ | $1.01 \times 10^{-5}$ | DMF              | 11        |
| 3     | <b>1</b>                                               | $4.09 \times 10^3$ | $3.6 \times 10^{-4}$  | DMF              | This work |
| 4     | $\{[Zn_2(Hbtc)_2(BTD-bpy)(MeOH)_2] \cdot MeOH\}_n$     | $6.12 \times 10^3$ | $2.38 \times 10^{-3}$ | H <sub>2</sub> O | 12        |
| 5     | $\{[Cd_3(HL)_2(H_2O)_3] \cdot 3H_2O \cdot 2CH_3CN\}_n$ | $6.99 \times 10^3$ | $1.17 \times 10^{-4}$ | H <sub>2</sub> O | 13        |
| 6     | $[Zn(pdca)(bbibp)_{0.5}]_n$                            | $8.05 \times 10^3$ | $3.7 \times 10^{-6}$  | H <sub>2</sub> O | 14        |

|    |                                                                                                       |                    |                       |                      |    |
|----|-------------------------------------------------------------------------------------------------------|--------------------|-----------------------|----------------------|----|
| 7  | $\{[\text{Zn}_2(1,4\text{-ndc})_2(\text{BTD-bpy})] \cdot 0.5\text{MeOH} \cdot \text{H}_2\text{O}\}_n$ | $8.94 \times 10^3$ | $0.75 \times 10^{-3}$ | $\text{H}_2\text{O}$ | 12 |
| 8  | $[\text{Zn}_2(\text{tpeb})(\text{bpdc})_2]$                                                           | $1.12 \times 10^4$ | $1.04 \times 10^{-3}$ | $\text{H}_2\text{O}$ | 15 |
| 9  | $[\text{Zn}(\text{L})_2] \cdot 2\text{DMF}$                                                           | $1.25 \times 10^4$ | $1.45 \times 10^{-3}$ | $\text{H}_2\text{O}$ | 16 |
| 10 | $[\text{Cd}(\text{bipy})][\text{HL}]_n$                                                               | $2.70 \times 10^5$ |                       | $\text{H}_2\text{O}$ | 17 |
| 11 | Cu(II)-tpt-on-Cu(I)-tpt membran                                                                       | $2.22 \times 10^5$ |                       | $\text{H}_2\text{O}$ | 18 |

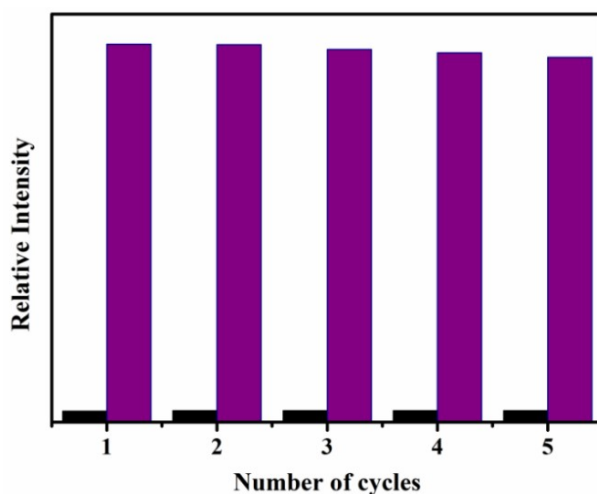

**Fig. S10.** Recoverable fluorescence intensity of **1** in recyclable experiments for  $\text{Cr}_2\text{O}_7^{2-}$  ion.

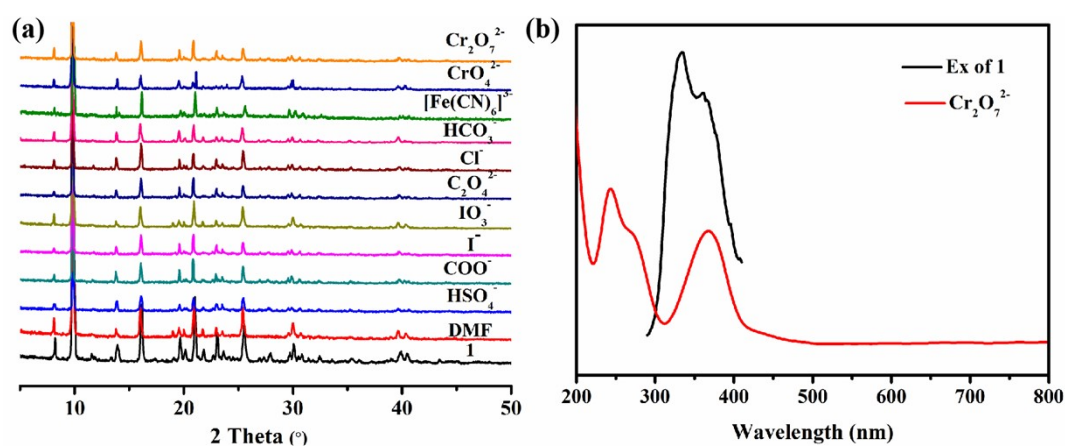

**Fig. S11** (a) PXRD patterns of **1** treated by different various anions. (b) UV-vis absorption spectra of  $\text{Cr}_2\text{O}_7^{2-}$  ion, and the excitation spectrum of **1**

## References

1. H. Y. Yang, D. Y. Qi, Z. Z. Chen, M. Y. Cao, Y. J. Deng, Z. X. Liu, C. Y. Shao and L. R. Yang, *J. Solid State Chem.*, 2021, **296**, 121970.
2. H. J. Wang, F. J. Cheng, C. C. Zou, Q. Q. Li, Y. Y. Hua, J. G. Duan and W. Q. Jin, *CrystEngComm.*, 2016, **18**, 5639-5646.

3. C. M. Ngue, M. K. Leung and K. L. Lu, *Inorg. Chem.*, 2020, **59**, 2997-3003.
4. Z. Sun, P. Hu, Y. Ma and L. Li, *Dyes. Pigment.*, 2017, **143**, 10-17.
5. Q. Zhao and C. D. Si, *Cryst. Res. Technol.*, 2019, **54**, 1800155.
6. X. D. Fang, J. Yao, R. Fan, X. F. Bai, Y. E. Liu, C. F. Hou, Q. Q. Xu, A. X. Zhu and B. Huang, *J. Solid State Chem.*, 2021, **294**, 121854.
7. S. L. Sun, X. Y. Sun, Q. Sun, E. Q. Gao, J. L. Zhang and W. J. Li, *J. Solid State Chem.*, 2020, **292**, 121701.
8. A. Li, L. Li, Z. Lin, L. Song, Z. H. Wang, Q. Chen, T. Yang, X. H. Zhou, H. P. Xiao and X. J. Yin, *New J. Chem.*, 2015, **39**, 2289-2295.
9. Y. Qiao, J. Guo, D. Li, H. Li, X. Xue, W. Jiang, G. Che and W. Guan, *J. Solid State Chem.*, 2020, **290**, 121610.
10. B. Qin, X. Y. Zhang, J. J. Qiu, G. Gahungu, H. Y. Yuan and J. P. Zhang, *Inorg. Chem.*, 2021, **60**, 1716-1725.
11. Y. Du, H. Yang, R. Liu, C. Shao and L. Yang, *Dalton Trans.*, 2020, **49**, 13003-13016.
12. Q. J. Jiang, J. Y. Lin, Z. J. Hu, V. K. S. Hsiao, M. Y. Chung and J. Y. Wu, *Cryst. Growth Des.*, 2021, **21**, 2056-2067.
13. W. Q. Tong, W. N. Liu, J. G. Cheng, P. F. Zhang, G. P. Li, L. Hou and Y. Y. Wang, *Dalton Trans.*, 2018, **47**, 9466-9473.
14. D. M. Zhang, C. G. Xu, Y. Z. Liu, C. B. Fan, B. Zhu and Y. H. Fan, *J. Solid State Chem.*, 2020, **290**, 121549.
15. B. B. Rath and J. J. Vittal, *Inorg. Chem.*, 2020, **59**, 8818-8826.
16. B. Li, Q. Q. Yan and G. P. Yong, *J. Mater. Chem. C*, 2020, **8**, 11786-11795.
17. W. Q. Kan and S. Z. Wen, *Dyes. Pigment.*, 2017, **139**, 372-380.
18. K. Zhu, R. Fan, J. Wu, B. Wang, H. Lu, X. Zheng, T. Sun, S. Gai, X. Zhou and Y. Yang, *ACS Appl. Mater. Inter.*, 2020, **12**, 58239-58251.
